# Supplementary material for: Rapid warming and degradation of mountain permafrost in Norway and Iceland
Source: Copernicus journal article supplement (doi:10.5194/tc-2023-50), 2023-05-23
Supplement: Supplementary file [file tc-2023-50-AC1-supplement.pdf]

TC – Submission of

***“Rapid warming and degradation of mountain permafrost in Norway and Iceland”***

by Etzelmüller et al.

**Comments to the reviewers.**

We thank both the reviewers and the editor for thoughtful comments. In the following the review comments are given in red, while our responses are given in black.

***Review 1 (Pelle Holmlund)***

The paper is well organized and it is clearly written and the illustrations are all very good. There are some minor details that can be adjusted: The appendix references are a bit unclear. A reference such as (Figure D1b) should rather be written (App. D, fig. 1d).

I think we follow the proper instructions given for the journal.

I am not familiar with the use of negative coordinates. For example, the site Saudafell with the coordinate -15°E. Why not 15°W as it is normally written?

Right, we changed

On line 28, there is a reference to van Everdingen 1998 which is missing in the reference list. In the reference list there is a Smith and Riseborough 2002 paper that I cannot find in the text.

Corrected
